# Supplementary material
Source: PubMed Central journal article supplement (PMC4761519)
Supplement: NIHMS747285-supplement-01.pdf [file NIHMS747285-supplement-01.pdf]

### Supplementary Data

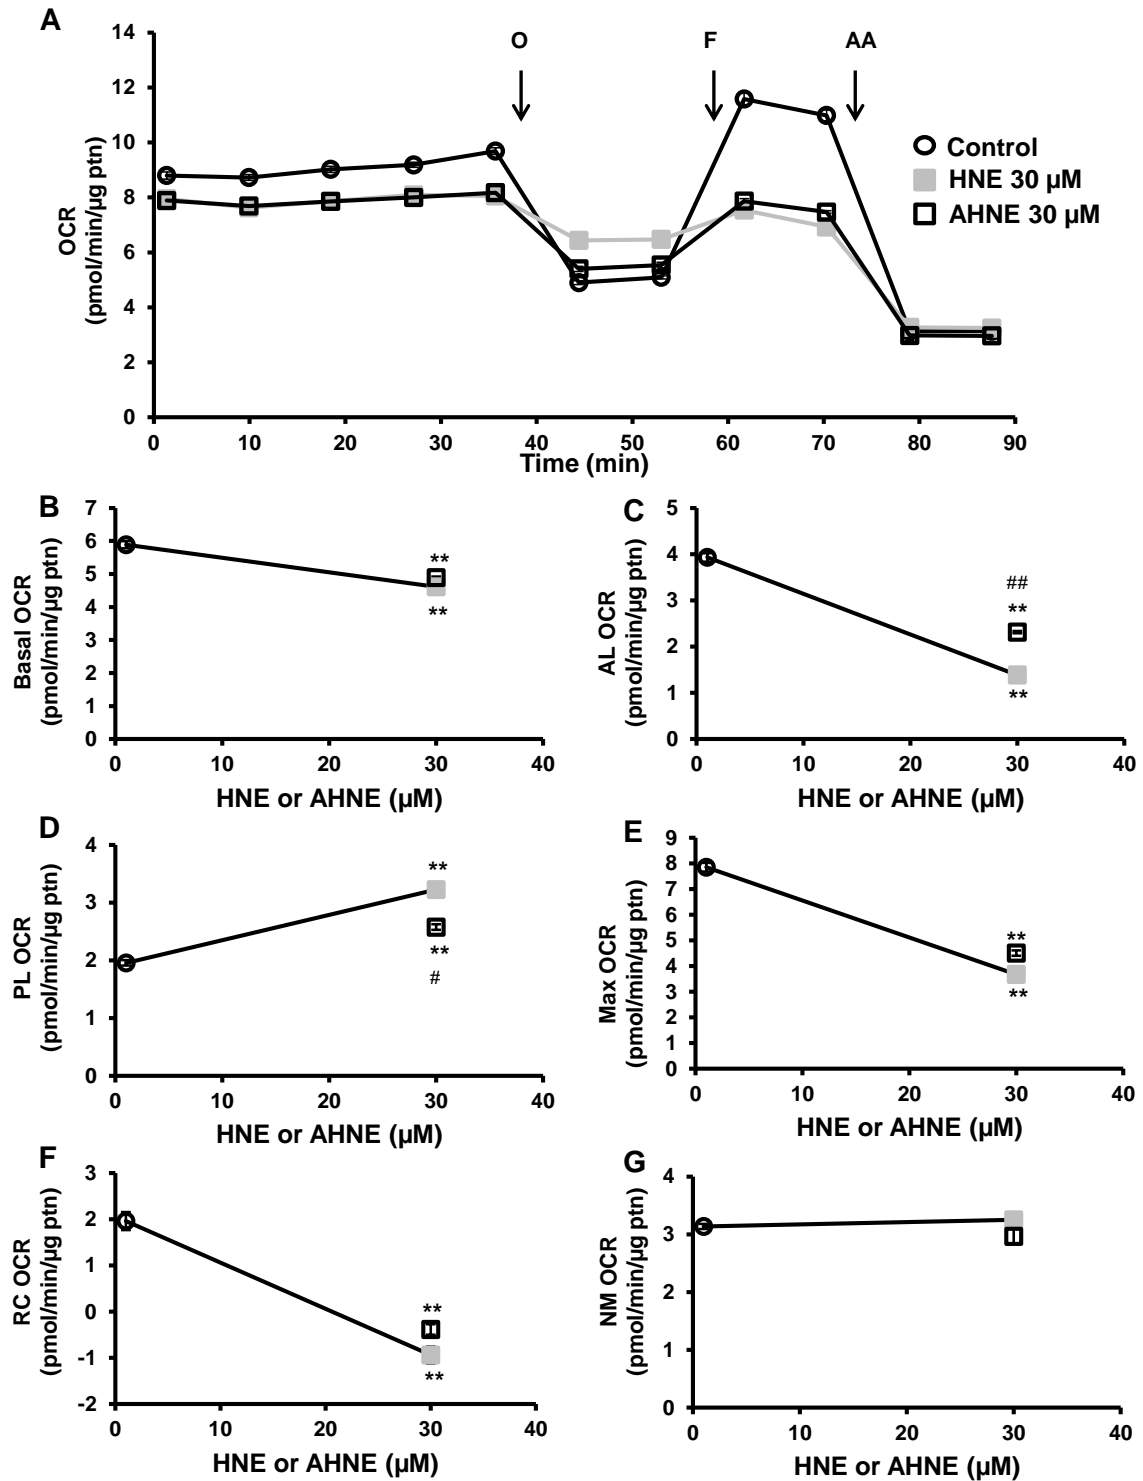

**Supplementary Figure 1: Comparing the effects of A-HNE to 4-HNE on mitochondrial respiration.** (A) Platelets were incubated with AHNE (30  $\mu$ M) or 4-HNE (HNE) (0-30  $\mu$ M) for 1h after which a mitochondrial stress test was performed by first measuring basal OCR, followed by sequential injection of oligomycin (O) (1  $\mu$ g/ml), FCCP (F) (0.6  $\mu$ M), antimycin A (AA) (10  $\mu$ M). Different indices of mitochondrial respiration (B) basal (basal OCR – AA OCR), (C) ATP-linked (AL) (basal OCR – oligomycin OCR), (D) proton leak (PL) (oligomycin OCR – AA OCR), (E) maximal (FCCP OCR – AA OCR), (F) reserve capacity (RC) (FCCP OCR – basal OCR) and (G) non-mitochondrial (NM) (AA OCR) were calculated. Data expressed as mean $\pm$ SEM from one representative donor, n = 5-6 replicates. \*\*p<0.01, different from thrombin. #p<0.05, ##p<0.01, different from 4-HNE (30  $\mu$ M).

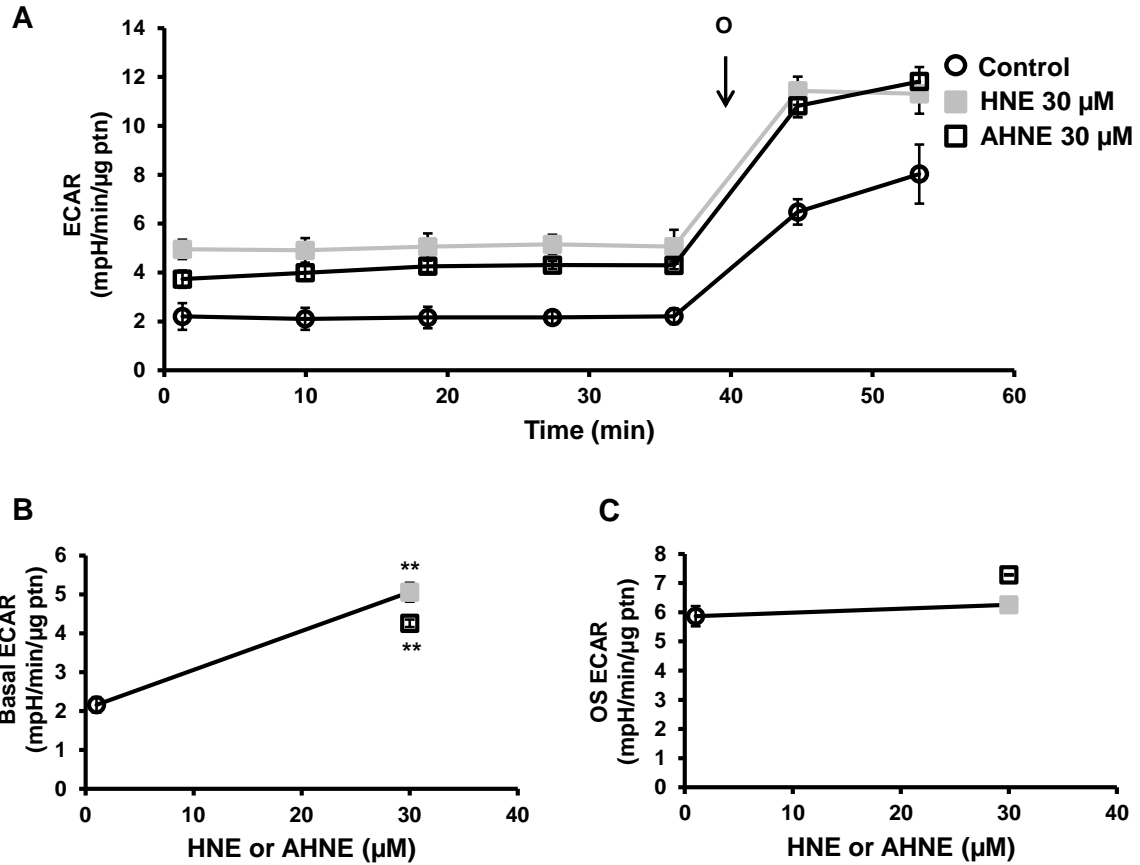

**Supplementary Figure 2: Comparing the effects of A-HNE to 4-HNE on glycolysis.** (A) Platelets were incubated with AHNE (30  $\mu\text{M}$ ) or 4-HNE (HNE) (0-30  $\mu\text{M}$ ) for 1h after which basal ECAR was measured, followed by injection of oligomycin (O) (1  $\mu\text{g}/\text{ml}$ ). Different indices of glycolytic function (B) basal (basal ECAR) and (C) oligomycin sensitive (OS) (oligomycin ECAR – basal ECAR) were calculated. Data expressed as mean $\pm$ SEM from one representative donor, n = 5-6 replicates. \*\*\*p<0.01, different from thrombin. ##p<0.01, different from 4-HNE (30  $\mu\text{M}$ ).

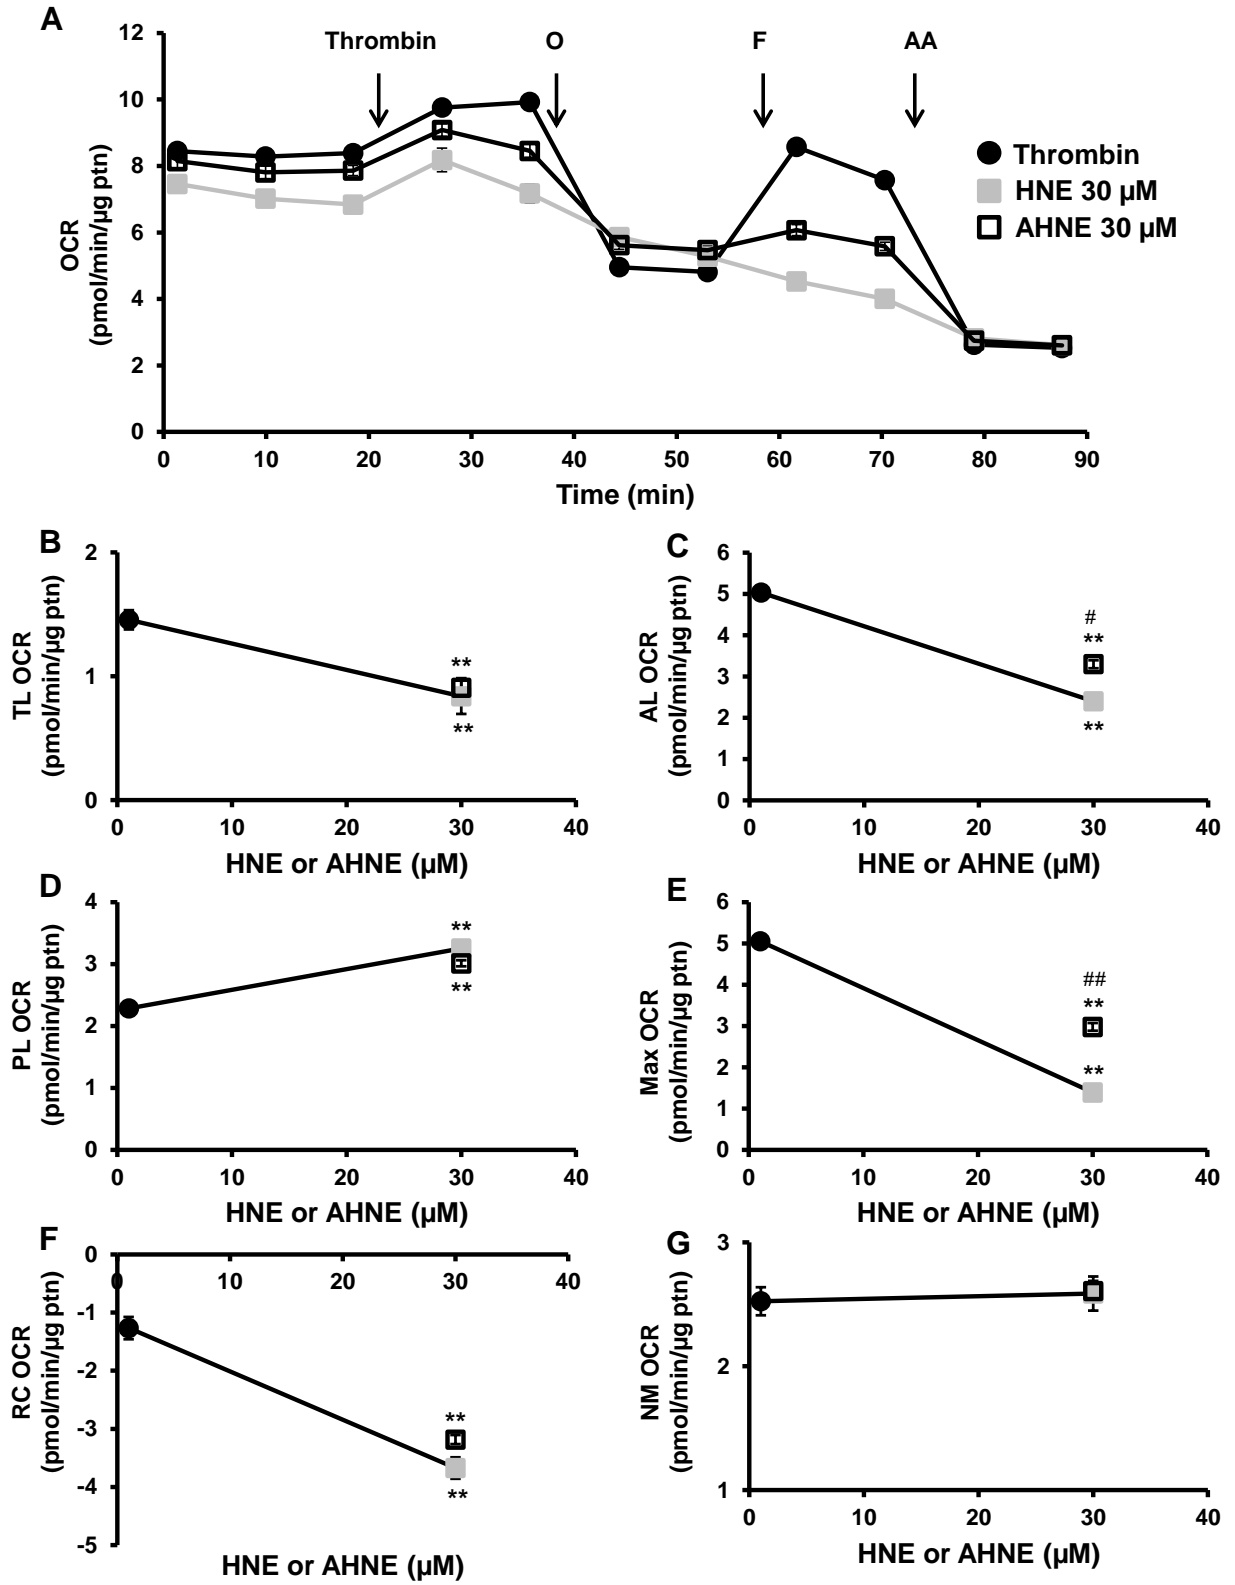

**Supplementary Figure 3: Comparing the effect of A-HNE to 4-HNE on mitochondrial respiration in the presence of thrombin.** (A) Platelets were incubated with AHNE (30  $\mu$ M) or 4-HNE (HNE) (0-30  $\mu$ M) for 1h after which a mitochondrial stress test was performed by first measuring basal OCR, followed by sequential injection of thrombin (0.5 U/ml) oligomycin (O) (1  $\mu$ g/ml), FCCP (F) (0.6  $\mu$ M), antimycin A (AA) (10  $\mu$ M). Different indices of mitochondrial respiration (B) thrombin linked (TL) (thrombin OCR – basal OCR), (C) ATP-linked (AL) (thrombin OCR – oligomycin OCR), (D) proton leak (PL) (oligomycin OCR – AA OCR), (E) maximal (FCCP OCR – AA OCR), (F) reserve capacity (RC) (FCCP OCR – thrombin OCR) and (G) non-mitochondrial (NM) (AA OCR) were calculated. Data expressed as mean $\pm$ SEM from one representative donor, n = 5-6 replicates. \*\*p<0.01, different from thrombin. #p<0.05, ##p<0.01, different from 4-HNE (30  $\mu$ M).

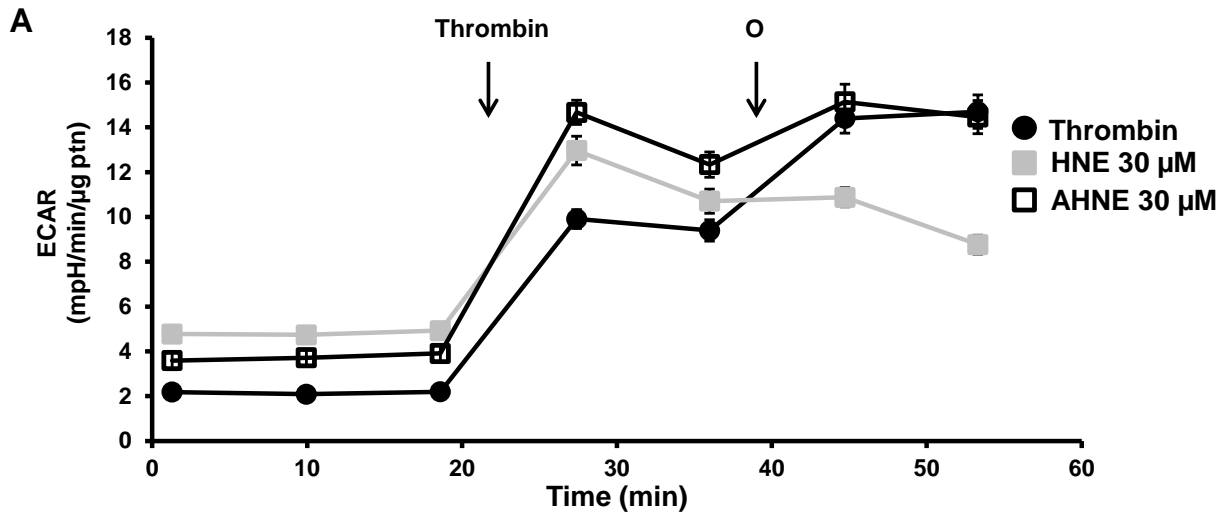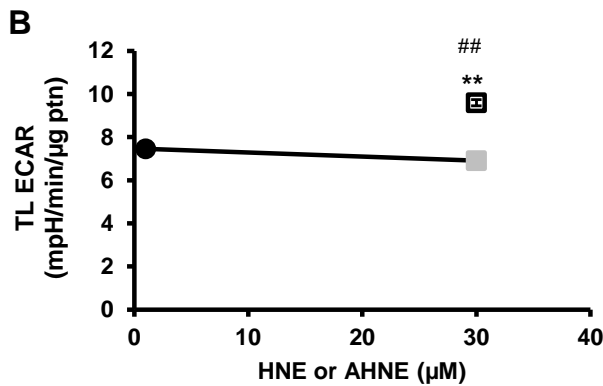

**Supplementary Figure 4: Comparing the effect of A-HNE to 4-HNE on glycolysis in the presence of thrombin.** (A) Platelets were incubated with AHNE (30  $\mu\text{M}$ ) or 4-HNE (HNE) (0-30  $\mu\text{M}$ ) for 1h after which basal ECAR was measured, followed by sequential injections of thrombin (0.5 U/ml) and oligomycin (O) (1  $\mu\text{g}/\text{ml}$ ). Different indices of glycolytic function (B) thrombin linked (TL) (thrombin ECAR) and (C) oligomycin sensitive (OS) (oligomycin ECAR – thrombin ECAR) were calculated. Data expressed as mean $\pm$ SEM from one representative donor, n = 5-6 replicates. \*\* $p < 0.01$ , different from thrombin. ## $p < 0.01$ , different from 4-HNE (30  $\mu\text{M}$ ).

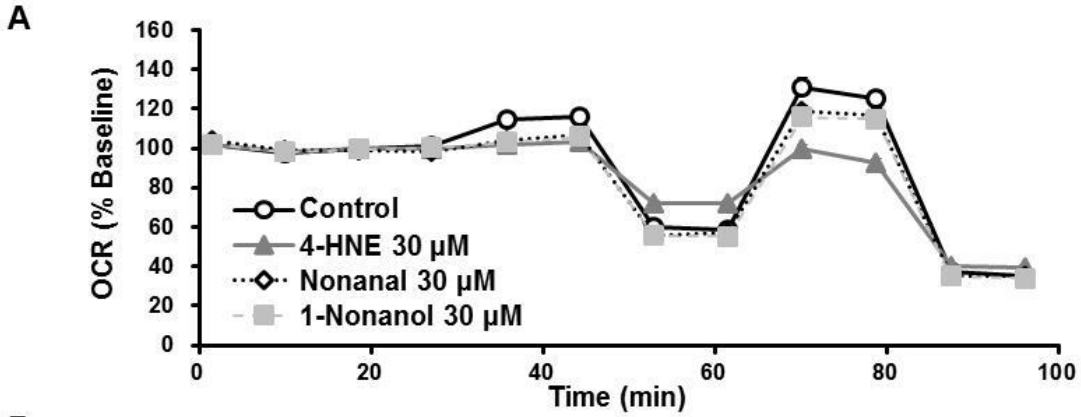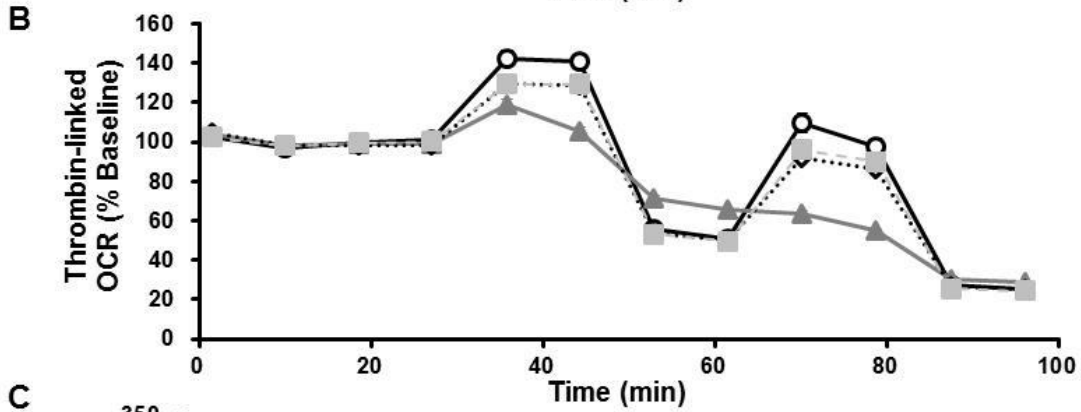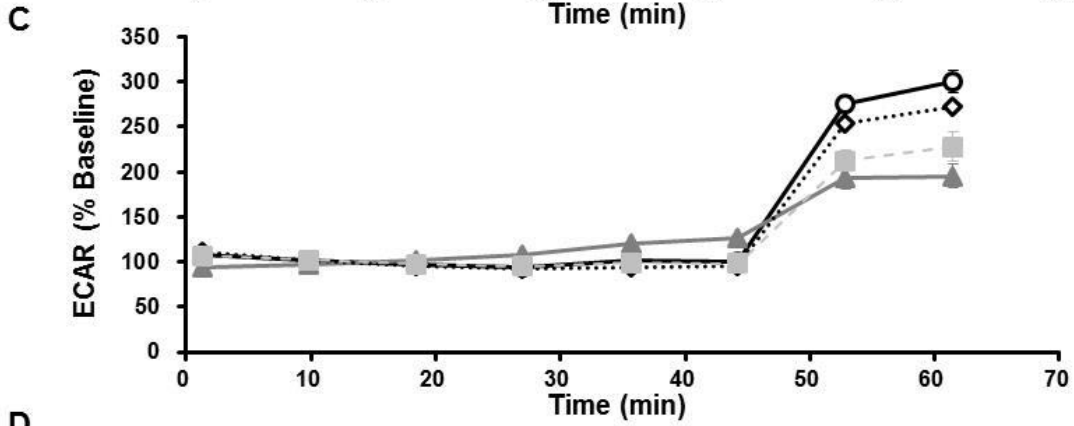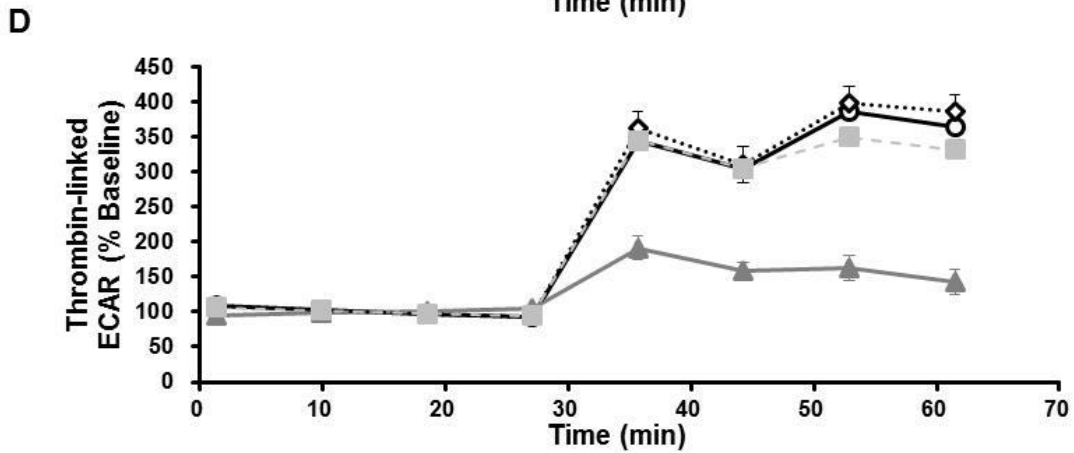

**Supplementary Figure 5: Comparing the effect of 4-HNE to its non-electrophilic analogs, nonanal and 1-nonanol in the presence and absence of thrombin.** Platelets were incubated with either vehicle control, HNE, nonanal or 1-nonanol (all 30  $\mu$ M) for 1h, after which basal OCR (A) was measured, following by thrombin-stimulated OCR (B). Glycolytic function (C) and thrombin-linked (TL) (thrombin ECAR) (D) were also measured. Data expressed as mean  $\pm$  SEM from two representative donors.

| N | Name                     | Accession | Peptides | %Cov |
|---|--------------------------|-----------|----------|------|
| 1 | Integrin alpha-6         | P23229    | 2        | 1    |
| 2 | Multimerin-1             | Q13201    | 3        | 3    |
| 3 | Platelet glycoprotein IX | P14770    | 2        | 12   |

**Supplementary Table 1: A-HNE modification of adhesion related proteins.** List of proteins identified in the A-HNE treated platelets, with protein accession ID, number of peptides identified with 95% confidence, percent coverage of the peptides identified to the sequence of the protein with 95% confidence.

| N  | Name                                            | Accession | Peptides | %Cov |
|----|-------------------------------------------------|-----------|----------|------|
| 1  | Actin-related protein 2/3 complex subunit 2     | O15144    | 2        | 7    |
| 2  | Actin-related protein 2/3 complex subunit 3     | O15145    | 3        | 16   |
| 3  | Actin-related protein 2/3 complex subunit 4     | P59998    | 5        | 30   |
| 4  | Actin-related protein 3                         | P61158    | 5        | 11   |
| 5  | Adenylyl cyclase-associated protein 1           | Q01518    | 7        | 12   |
| 6  | Bridging integrator 2                           | Q9UBW5    | 5        | 9    |
| 7  | Coronin-1C                                      | Q9ULV4    | 3        | 6    |
| 8  | F-actin-capping protein subunit alpha-2         | P47755    | 2        | 6    |
| 9  | F-actin-capping protein subunit beta            | P47756    | 3        | 14   |
| 10 | Myosin regulatory light chain 12A               | P19105    | 5        | 24   |
| 11 | Myosin regulatory light chain 12B               | O14950    | 5        | 24   |
| 12 | Myosin regulatory light polypeptide 9           | P24844    | 4        | 17   |
| 13 | Myosin-10                                       | P35580    | 6        | 3    |
| 14 | Putative tropomyosin alpha-3 chain-like protein | A6NL28    | 6        | 17   |
| 15 | Tropomyosin alpha-1 chain                       | Q06753    | 10       | 31   |
| 16 | Tropomyosin alpha-3 chain                       | P06753    | 11       | 34   |
| 17 | Tropomyosin alpha-4 chain                       | P67936    | 18       | 55   |
| 18 | Tubulin alpha-8 chain                           | Q9NY65    | 9        | 16   |
| 19 | Vasodilator-stimulated phosphoprotein           | P50552    | 4        | 12   |
| 20 | Zyxin                                           | Q15942    | 8        | 20   |

**Supplementary Table 2: A-HNE modification of proteins involved in cytoskeletal reorganization.** List of proteins identified in the A-HNE treated platelets, with protein accession ID, number of peptides identified with 95% confidence, percent coverage of the peptides identified to the sequence of the protein with 95% confidence.



| N | Name                                                 | Accession | Peptides | %Cov |
|---|------------------------------------------------------|-----------|----------|------|
| 1 | Calnexin                                             | P27824    | 2        | 3    |
| 2 | Endoplasmic                                          | P14625    | 7        | 9    |
| 3 | Heat shock protein HSP 90-alpha                      | P07900    | 10       | 13   |
| 4 | Heat shock protein HSP 90-beta                       | P08238    | 6        | 9    |
| 5 | Peptidyl-prolyl cis-trans isomerase F, mitochondrial | P30405    | 2        | 8    |
| 6 | 60 kDa heat shock protein, mitochondrial             | P10809    | 2        | 3    |

**Supplementary Table 3: A-HNE modifications of proteins involved in protein folding.** List of proteins identified in the A-HNE treated platelets, with protein accession ID, number of peptides identified with 95% confidence, percent coverage of the peptides identified to the sequence of the protein with 95% confidence.

| N  | Name                                                             | Accession | Peptides | %Cov |
|----|------------------------------------------------------------------|-----------|----------|------|
| 1  | GTP-binding protein SAR1a                                        | Q9NR31    | 2        | 12   |
| 2  | Guanine nucleotide-binding protein G(I)/G(S)/G(T) subunit beta-1 | P62873    | 2        | 6    |
| 3  | Guanine nucleotide-binding protein G(I)/G(S)/G(T) subunit beta-2 | P62879    | 2        | 6    |
| 4  | Guanine nucleotide-binding protein subunit beta-4                | Q9HAV0    | 2        | 6    |
| 5  | Rab GDP dissociation inhibitor alpha                             | P31150    | 2        | 4    |
| 6  | Rab GDP dissociation inhibitor beta                              | P50395    | 2        | 4    |
| 7  | Ras-related protein Rab-11A                                      | P62491    | 3        | 13   |
| 8  | Ras-related protein Rab-11B                                      | Q15907    | 3        | 13   |
| 9  | Ras-related protein Rab-27B                                      | O00194    | 3        | 9    |
| 10 | Ras-related protein Rab-6A                                       | P20340    | 2        | 11   |
| 11 | Ras-related protein Rab-6B                                       | Q9NRW1    | 2        | 11   |

**Supplementary Table 4: A-HNE modification of small GTPase proteins.** List of proteins identified in the A-HNE treated platelets, with protein accession ID, number of peptides identified with 95% confidence, percent coverage of the peptides identified to the sequence of the protein with 95% confidence.

| N  | Name                                                               | Accession | Peptides | %Cov |
|----|--------------------------------------------------------------------|-----------|----------|------|
| 1  | ATP synthase subunit alpha, mitochondrial                          | P25705    | 5        | 11   |
| 2  | ATP synthase subunit beta, mitochondrial                           | P06576    | 7        | 18   |
| 3  | Hexokinase-1                                                       | P19367    | 5        | 5    |
| 4  | Isocitrate dehydrogenase [NADP], mitochondrial                     | P48735    | 7        | 17   |
| 5  | Malate dehydrogenase, cytoplasmic                                  | P40925    | 2        | 6    |
| 6  | Malate dehydrogenase, mitochondrial                                | P40926    | 4        | 12   |
| 7  | Solute carrier family 2, facilitated glucose transporter member 14 | Q8TDB8    | 2        | 3    |
| 8  | Solute carrier family 2, facilitated glucose transporter member 3  | P11169    | 2        | 3    |
| 9  | Triosephosphate isomerase                                          | P60174    | 4        | 21   |
| 10 | Voltage-dependent anion-selective channel protein 3                | Q9Y277    | 2        | 7    |

**Supplementary Table 5: A-HNE modification of metabolism related proteins.** List of proteins identified in the A-HNE treated platelets, with protein accession ID, number of peptides identified with 95% confidence, percent coverage of the peptides identified to the sequence of the protein with 95% confidence.

| N | Name                         | Accession | Peptides | %Cov |
|---|------------------------------|-----------|----------|------|
| 1 | Integrin beta-3              | P05106    | 13       | 14   |
| 2 | Leukocyte elastase inhibitor | P30740    | 3        | 8    |
| 3 | Serum albumin                | P02768    | 6        | 8    |

**Supplementary Table 6: A-HNE modification of proteins involved in aggregation.** List of proteins identified in the A-HNE treated platelets, with protein accession ID, number of peptides identified with 95% confidence, percent coverage of the peptides identified to the sequence of the protein with 95% confidence.

| N | Name                                     | Accession | Peptides | %Cov |
|---|------------------------------------------|-----------|----------|------|
| 1 | Glutathione peroxidase 1                 | P07203    | 2        | 11   |
| 2 | Glutathione S-transferase P              | P09211    | 2        | 15   |
| 3 | Peroxiredoxin-1                          | Q06830    | 2        | 11   |
| 4 | Peroxiredoxin-6                          | P30041    | 2        | 9    |
| 5 | Superoxide dismutase [Mn], mitochondrial | P04179    | 3        | 14   |

**Supplementary Table 7: A-HNE modification of antioxidant enzymes.**

List of proteins identified in the A-HNE treated platelets, with protein accession ID, number of peptides identified with 95% confidence, percent coverage of the peptides identified to the sequence of the protein with 95% confidence.

| N  | Name                                       | Accession | Peptides | %Cov |
|----|--------------------------------------------|-----------|----------|------|
| 1  | Calpain-1 catalytic subunit                | P07384    | 6        | 6    |
| 2  | Carbonic anhydrase 2                       | P00918    | 3        | 11   |
| 3  | Chloride intracellular channel protein 1   | O00299    | 6        | 28   |
| 4  | Galectin-related protein                   | Q3ZCW2    | 3        | 19   |
| 5  | Protein disulfide-isomerase                | P07237    | 3        | 6    |
| 6  | Protein disulfide-isomerase A3             | P30101    | 11       | 21   |
| 7  | Protein S100-A8                            | P05109    | 3        | 31   |
| 8  | Protein S100-A9                            | P06702    | 3        | 31   |
| 9  | Proto-oncogene tyrosine-protein kinase Src | P12931    | 4        | 6    |
| 10 | Purine nucleoside phosphorylase            | P00491    | 6        | 19   |
| 11 | Syntaxin-binding protein 2                 | Q15833    | 2        | 3    |

**Supplementary Table 8: A-HNE modification of proteins involved in signaling activities.**

List of proteins identified in the A-HNE treated platelets, with protein accession ID, number of peptides identified with 95% confidence, percent coverage of the peptides identified to the sequence of the protein with 95% confidence.

| N | Name                                      | Accession | Peptides | %Cov |
|---|-------------------------------------------|-----------|----------|------|
| 1 | EH domain-containing protein 3            | Q9NZN3    | 2        | 4    |
| 2 | Reticulon-4                               | Q9NQC3    | 2        | 2    |
| 3 | Transitional endoplasmic reticulum ATPase | P55072    | 4        | 5    |

**Supplementary Table 9: A-HNE modifications on proteins involved vesicular transport.** List of proteins identified in the A-HNE treated platelets, with protein accession ID, number of peptides identified with 95% confidence, percent coverage of the peptides identified to the sequence of the protein with 95% confidence.
